# Supplementary material for: Probing Multi-Target Action of Phlorotannins as New Monoamine Oxidase Inhibitors and Dopaminergic Receptor Modulators with the Potential for Treatment of Neuronal Disorders
Source: PubMed Central journal article supplement (PMC6627067; doi:10.3390/md17060377), 2019-06-24
Supplement: marinedrugs-17-00377-s001.pdf [file marinedrugs-17-00377-s001.pdf]

## *Supplementary Files:*

# **Probing Multi-Target Action of Phlorotannins as New Monoamine Oxidase Inhibitors and Dopaminergic Receptor Modulators with Potential for the Treatment of Neuronal Disorders**

**Su Hui Seong<sup>1</sup>, Pradeep Paudel<sup>1</sup>, Jeong-Wook Choi<sup>1</sup>, Dong Hyun Ahn<sup>2</sup>, Taek-Jeong Nam<sup>1</sup>, Hyun Ah Jung<sup>3,\*</sup>, and Jae Sue Choi<sup>1,\*</sup>**

<sup>1</sup> Department of Food and Life Science, Pukyong National University, Busan 48513, Korea; seongsuhui@naver.com (S.H.S.), phr.paudel@gmail.com (P.P.), wook8309@naver.com (J.W.C.), namtj@pknu.ac.kr (T.J.N.)

<sup>2</sup> Department of Food Science and Technology, Pukyong National University, Busan 48513, Korea; dhahn@pknu.ac.kr (D.H.A.)

<sup>3</sup> Department of Food Science and Human Nutrition, Chonbuk National University, Jeonju 54896, Korea

\* Correspondence: jungha@jbnu.ac.kr (H.A.J.); choijs@pknu.ac.kr (J.S.C.); Tel.: +82-63-270-4882 (H.A.J.); +82-51-629-5845 (J.S.C.)

Received: date; Accepted: date; Published: date

## Contents

**Table S1.** Binding sites and docking score of compounds in human D<sub>1</sub>R built by homology modeling.

**Table S2.** Binding sites and docking score of compounds in human D<sub>3</sub>R.

**Table S3.** Binding sites and docking score of compounds in human D<sub>4</sub>R.

**Table S4.** Experimental conditions for functional assays.

**Table S1.** Binding sites and docking score of compounds in human D<sub>1</sub>R built by homology modeling.

| <b>Compounds</b>                       | <b>B-energy<br/>(kcal/mol)</b> | <b>No. of<br/>H-bonds</b> | <b>H-bond interaction residues</b>                                 | <b>Other interacting residues</b>                                                                                                                    |
|----------------------------------------|--------------------------------|---------------------------|--------------------------------------------------------------------|------------------------------------------------------------------------------------------------------------------------------------------------------|
| Dopamine <sup>a</sup><br>(Agonist)     | -5.39                          | 5                         | Asp103 (two salt bridges),<br>Ser202, Ser199, Ser198 (O-H<br>bond) | Phe288 ( $\pi$ -cation), Phe289 ( $\pi$ - $\pi$ T-shaped), Ile104 ( $\pi$ -alkyl)                                                                    |
| SCH 23390 <sup>a</sup><br>(Antagonist) | -6.86                          | 2                         | Asp103, Ser107 (O-H bond),                                         | Asn292 (two C-H bonds), Ile104, Leu190 ( $\pi$ -sigma), Phe288 ( $\pi$ - $\pi$ T-shaped), Phe289, Val100 ( $\pi$ -alkyl)                             |
| Phloroglucinol                         | -3.52                          | 2                         | Ser107, Ser199 (O-H bond)                                          | Ile104 ( $\pi$ -sigma), Ser202 ( $\pi$ -OH bond)                                                                                                     |
| Dieckol                                | -7.29                          | 2                         | Tyr194, Asp103 (O-H bond)                                          | Ile154, Leu190, Ile201 ( $\pi$ -sigma), Ser198 ( $\pi$ -Lone pair), Phe288 ( $\pi$ - $\pi$ T-shaped), Ile104, Ile154, Pro158, Ile201 ( $\pi$ -Alkyl) |
| PFF-A                                  | -4.11                          | 5                         | Lys81, Tyr194, Ala195, Asp103,<br>Asp314 (O-H bond)                | Lys81 ( $\pi$ -cation), Ser188 ( $\pi$ -OH bond), Val317 ( $\pi$ -sigma), Phe288 ( $\pi$ - $\pi$ T-shaped), Ile104, Leu190, Cys186 ( $\pi$ -alkyl)   |

<sup>a</sup>Dopamine and SCH 23390 were used as positive ligands.

**Table S2.** Binding sites and docking score of compounds in human D<sub>3</sub>R.

| Compounds                                | B-energy (kcal/mol) | No. of H-bonds | H-bond interaction residues                                  | Other interacting residues                                                                                                                                                                             |
|------------------------------------------|---------------------|----------------|--------------------------------------------------------------|--------------------------------------------------------------------------------------------------------------------------------------------------------------------------------------------------------|
| Dopamine <sup>a</sup><br>(Agonist)       | -5.84               | 5              | Asp110 (two salt bridges), Val111, Thr115, Ser196 (O-H bond) | Val111 and Cys114 (alkyl), Phe346 ( $\pi$ -alkyl)                                                                                                                                                      |
| Eticlopride <sup>a</sup><br>(Antagonist) | -8.50 <sup>b</sup>  | 2              | Asp110 (salt bridge, O-H bond)                               | Val111, Cys114, Val189 (alkyl), Phe346, His349, Ile183 ( $\pi$ -alkyl), Phe345 ( $\pi$ - $\pi$ T-shaped)                                                                                               |
| Phloroglucinol                           | -3.98               | 2              | Cys181 and Asp110 (O-H bond)                                 | Ile183 and Val107 ( $\pi$ -alkyl)                                                                                                                                                                      |
| Dieckol                                  | -9.78               | 4              | Ser192, Cys181, Val86, Val189 (O-H bond)                     | Asp110 ( $\pi$ anion), His349 ( $\pi$ -lone pair), Phe345 ( $\pi$ - $\pi$ stacked), Tyr365 ( $\pi$ - $\pi$ T-shaped), Leu89, Val180, Val111, Cys114, Val189 ( $\pi$ -alkyl), Val111, Ser182 (C-H bond) |
| PFF-A                                    | -9.17               | 5              | Ile183, Tyr373, Tyr365, Asp110, Val189 (O-H bond)            | Asp110 ( $\pi$ -anion), Cys114 ( $\pi$ -sulfur), Phe346 ( $\pi$ - $\pi$ stacked), Val86, Ile183, Val189 ( $\pi$ -alkyl), Ser192 (C-O bond)                                                             |

<sup>a</sup>Dopamine and eticlopride were used as positive ligands. <sup>b</sup>RMSD value: 0.48 Å

**Table S3.** Binding sites and docking score of compounds in human D<sub>4</sub>R.

| Compounds                           | B-energy (kcal/mol) | No. of H-bonds | H-bond interaction residues                                      | Other interacting residues                                                                                                                                                                           |
|-------------------------------------|---------------------|----------------|------------------------------------------------------------------|------------------------------------------------------------------------------------------------------------------------------------------------------------------------------------------------------|
| Dopamine <sup>a</sup> (Agonist)     | -5.68               | 3              | Asp115 (salt bridge), Ser196 (O-H bond)                          | Cys119 ( $\pi$ -alkyl), Val116 ( $\pi$ -sigma), Phe410 ( $\pi$ - $\pi$ T shaped)                                                                                                                     |
| Clozapine <sup>a</sup> (Antagonist) | -9.49               | 1              | Asp115 (salt bridge)                                             | Arg186, Leu187, Val193, Val116, Cys119 (alkyl), Phe411, His414, Val193, Val116 ( $\pi$ -alkyl), Phe410, His414 ( $\pi$ - $\pi$ T-shaped), Leu187 ( $\pi$ -sigma), Cys185 (C-O bond)                  |
| Phloroglucinol                      | -4.21               | 4              | Ser94, Leu90, Val87, Tyr438 (O-H bond)                           | Leu90 (amide- $\pi$ stacked), Leu111 ( $\pi$ -alkyl), Phe91 (van der Waals)                                                                                                                          |
| Dieckol                             | -9.91               | 7              | Cys185, His414, Ser197, Leu187, Asp115, Tyr438 (O-H bond)        | His414 ( $\pi$ -cation), Glu95, Asp115 ( $\pi$ -anion), Leu188, Val193, Thr434 ( $\pi$ -sigma), Met112 (Pi-sulfur), His414 ( $\pi$ - $\pi$ T-shaped), Cys185, Leu187, Val193, Arg186 ( $\pi$ -alkyl) |
| PFF-A                               | -10.4               | 8              | Ser94, Arg186, Ser197, Leu187, Asp115, Cys185, Tyr438 (O-H bond) | His414 ( $\pi$ -cation), Cys185 ( $\pi$ -lone pair), His414 ( $\pi$ - $\pi$ T-shaped), Arg186, Leu187, Met112, Cys185, Val193, Leu111 ( $\pi$ -alkyl)                                                |

<sup>a</sup>Dopamine and clozapine were used as positive ligands.

**Table S4.**

| <b>Assay</b>      | <b>Receptors<br/>(Gene name)</b>         | <b>Source</b>                      | <b>Stimulus</b>                                                                                                                                               | <b>Incubation</b> | <b>Measured<br/>Component</b>        | <b>Detection<br/>Method</b> |
|-------------------|------------------------------------------|------------------------------------|---------------------------------------------------------------------------------------------------------------------------------------------------------------|-------------------|--------------------------------------|-----------------------------|
| Agonist effect    | D <sub>1</sub> ( <i>h</i> )<br>(DRD1)    | Human recombinant<br>(CHO cells)   | None<br>(control: 10 μM dopamine)<br>Dopamine (300 nM)                                                                                                        | 30 min<br>RT      | cAMP                                 | HTRF                        |
| Antagonist effect |                                          |                                    |                                                                                                                                                               | 30 min<br>RT      | cAMP                                 | HTRF                        |
| Agonist effect    | D <sub>3</sub> ( <i>h</i> )<br>(DRD3)    | Human recombinant<br>(CHO cells)   | None<br>(control: 300 nM dopamine)<br>Dopamine (10 nM)                                                                                                        | 30 min<br>37 °C   | cAMP                                 | HTRF                        |
| Antagonist effect |                                          |                                    |                                                                                                                                                               | 30 min<br>37 °C   | cAMP                                 | HTRF                        |
| Agonist effect    | D <sub>4</sub> ( <i>h</i> )<br>(DRD4)    | Human recombinant<br>(CHO cells)   | None<br>(control: 10 μM dopamine)<br>Dopamine (100 nM)                                                                                                        | 10 min<br>37 °C   | cAMP                                 | HTRF                        |
| Antagonist effect |                                          |                                    |                                                                                                                                                               | 10 min<br>37 °C   | cAMP                                 | HTRF                        |
| Agonist effect    | M <sub>5</sub> ( <i>h</i> )<br>(CHRM5)   | Human recombinant<br>(RBL cells)   | None<br>(control: 0.624 μM ACh)<br>ACh (10 nM)                                                                                                                | RT                | Intracellular<br>[Ca <sup>2+</sup> ] | Fluorimetry                 |
| Antagonist effect |                                          |                                    |                                                                                                                                                               | RT                | Intracellular<br>[Ca <sup>2+</sup> ] | Fluorimetry                 |
| Agonist effect    | NK <sub>1</sub> ( <i>h</i> )<br>(TACR1)  | Human endogenous<br>(U373MG cells) | None<br>(control: 30 nM [Sar <sup>9</sup> ,<br>Met(O <sub>2</sub> ) <sup>11</sup> ]-SP)<br>[Sar <sup>9</sup> , Met(O <sub>2</sub> ) <sup>11</sup> ]-SP (1 nM) | RT                | Intracellular<br>[Ca <sup>2+</sup> ] | Fluorimetry                 |
| Antagonist effect |                                          |                                    |                                                                                                                                                               | RT                | Intracellular<br>[Ca <sup>2+</sup> ] | Fluorimetry                 |
| Agonist effect    | V <sub>1a</sub> ( <i>h</i> )<br>(AVPR1A) | Human recombinant<br>(CHO cells)   | None<br>(control: 1 μM AVP)<br>AVP (10 nM)                                                                                                                    | RT                | Intracellular<br>[Ca <sup>2+</sup> ] | Fluorimetry                 |
| Antagonist        |                                          |                                    |                                                                                                                                                               | RT                | Intracellular                        | Fluorimetry                 |

|            |                                 |               |                             |    |                     |             |
|------------|---------------------------------|---------------|-----------------------------|----|---------------------|-------------|
| effect     |                                 |               |                             |    | [Ca <sup>2+</sup> ] |             |
| Agonist    | 5-HT <sub>1A</sub> ( <i>h</i> ) | Human         | None                        | RT | Intracellular       | Fluorimetry |
| effect     | (HTR1A)                         | recombinant   | (control: 2.5 μM serotonin) |    | [Ca <sup>2+</sup> ] |             |
| Antagonist |                                 | (BA/F3 cells) | Serotonin (30 nM)           | RT | Intracellular       | Fluorimetry |
| effect     |                                 |               |                             |    | [Ca <sup>2+</sup> ] |             |

---

HTRF: Homogeneous time resolved fluorescence
